# Supplementary material for: Ring-opening copolymerization of ε-caprolactone and δ-valerolactone by a titanium-based metal–organic framework
Source: Royal Society of Chemistry journal article supplement (doi:10.1039/d1nj01946e), 2021-01-01
Supplement: d1nj01946e1.pdf [file d1nj01946e1.pdf]

## Electronic Supporting Information

### Ring-opening copolymerization of $\epsilon$ -caprolactone and $\delta$ -valerolactone by Titanium-based metal-organic framework

Rahaman M. Abdur,<sup>abc</sup> Bibimaryam Mousavi,<sup>\*a</sup> Hossain M. Shahadat,<sup>abd</sup> Nishat Akther,<sup>e</sup> Zhixiong Luo,<sup>a</sup> Serge Zhuiykov,<sup>f</sup> and Francis Verpoort<sup>\*af</sup>

<sup>a</sup> Laboratory of Organometallics, Catalysis and Ordered Materials, State Key Laboratory of Advanced Technology for Materials Synthesis and Processing, Wuhan University of Technology, Wuhan 430070, China.

<sup>b</sup> School of Materials Science and Engineering, Wuhan University of Technology, Wuhan 430070, China.

<sup>c</sup> Department of Chemistry, Mawlana Bhashani Science and Technology University, Santosh, Tangail-1902, Bangladesh.

<sup>d</sup> Department of Chemistry, Comilla University, Cumilla 3506, Bangladesh

<sup>e</sup> Department of Biochemistry and Molecular Biology, Mawlana Bhashani Science and Technology University, Santosh, Tangail-1902, Bangladesh

<sup>f</sup> Center for Environmental and Energy Research, Ghent University, Global Campus, 119 Songdomunhwa-Ro, Yeonsu-Gu, Incheon 404-806, South Korea

Corresponding Authors: Francis Verpoort (Francis.verpoort@ghent.ac.kr),  
Bibimaryam Mousavi (chem\_moosavi2006@yahoo.com)

## Contents

|                                                                                                 |              |
|-------------------------------------------------------------------------------------------------|--------------|
| <b>1. Experimental section</b>                                                                  | <b>3</b>     |
| 1.1. Materials                                                                                  | 3            |
| 1.2. Synthesis of MIL-125                                                                       | 3            |
| <b>2. Characterization of catalyst MIL-125</b>                                                  | <b>4-6</b>   |
| <b>FIGURE S1</b> PXRD of MIL-125                                                                | 4            |
| <b>FIGURE S2</b> SEM images of MIL-125                                                          | 4            |
| <b>FIGURE S3</b> FT-IR spectrum of MIL-125                                                      | 5            |
| <b>FIGURE S4</b> TGA curve of MIL-125 ranging from 30 °C to 800 °C                              | 5            |
| <b>FIGURE S5</b> The nitrogen adsorption-desorption isotherms for MIL-125                       | 6            |
| <b>FIGURE S6</b> (a) NH <sub>3</sub> -TPD and (b) CO <sub>2</sub> -TPD profiles of MIL-125      | 6            |
| <b>3. Synthesis and characterizations of polymers</b>                                           | <b>7-14</b>  |
| 3.1. Synthesis of polymers                                                                      | 7            |
| 3.2. Characterizations of polymers                                                              | 7            |
| <b>FIGURE S7</b> Comparison of FT-IR spectra of PCL, PVL and poly(CL- <i>co</i> -VL)            | 8            |
| <b>FIGURE S8</b> <sup>1</sup> H NMR spectra of copolymers obtained at different time            | 8            |
| <b>FIGURE S9</b> <sup>13</sup> C NMR of PCL and PVL                                             | 9            |
| <b>Randomness Calculation</b>                                                                   | 9            |
| <b>Reactivity ratio</b>                                                                         | 9            |
| <b>TABLE S1</b> Molar feed ratio of the monomers and copolymer composition                      | 10           |
| <b>FIGURE S10</b> Reactivity ratio analysis of CL and VL                                        | 10           |
| <b>FIGURE S11</b> <sup>1</sup> H- <sup>13</sup> C HMBC NMR spectrum of Poly(CL- <i>co</i> -VL)  | 11           |
| <b>FIGURE S12</b> GPC traces of obtained Poly(CL- <i>co</i> -VL)                                | 11           |
| <b>TABLE S2</b> Kinetics study of the copolymerization                                          | 12           |
| <b>FIGURE S13</b> Dependence of <i>M<sub>n</sub></i> and <i>D</i> on monomer conversion         | 12           |
| <b>FIGURE S14</b> Kinetics study for Poly(CL- <i>co</i> -VL) synthesis                          | 13           |
| <b>Table S3</b> Thermal behaviour of synthesized copolymers                                     | 13           |
| <b>FIGURE 15</b> MALDI-TOF MS spectra of low molecular weight poly(CL- <i>co</i> -VL) copolymer | 13           |
| <b>TABLE S4</b> Assignment of calculated and experimental MALDI-TOF MS signals                  | 14           |
| <b>TABLE S5</b> Copolymerization of CL with VL initiated with the components of MIL-125         | 14           |
| <b>4. Comparison between before and after polymerization</b>                                    | <b>15-16</b> |
| <b>FIGURE S16</b> PXRD patterns of MIL-125 before and after the polymerization reaction         | 15           |
| <b>FIGURE S17</b> SEM images of MIL-125 before and after the polymerization reaction            | 15           |
| <b>TABLE S6</b> Metal content in MIL-125 before and after polymerization                        | 16           |
| <b>TABLE S7</b> Catalyst (MIL-125) recycling studies                                            | 16           |
| <b>References</b>                                                                               | <b>16</b>    |

## 1. Experimental section

**1.1. Materials.** Benzene-1,4-dicarboxylic acid (BDC; 98%), titanium isopropoxide ( $\text{Ti}(i\text{PrO})_4$ ; 97%), CL (purity ~99%) and VL (98%) were purchased from the commercial supplier (Aladdin Chemical Co. Ltd.). CL and VL were used after two times distillation over  $\text{CaH}_2$  under reduced pressure. All reagents and solvents were analytical grade and used as received from the supplier without further purification.

**1.2. Synthesis of MIL-125.** MIL-125 was synthesized by the reflux method according to the known procedure with slight modification.<sup>1</sup> BDC (1.2 g, 7.2 mmol) was dissolved in dry DMF (40 mL) and stirred it in a three-necked round bottom flask with a reflux condenser under an inert atmosphere at 110 °C for 1 h. After that, anhydrous MeOH (approximately 10 mL) was added to the solution and heated again for 1 h at 110 °C under stirring and reflux conditions. However,  $\text{Ti}(i\text{PrO})_4$  (1.5 mL, 5 mmol) was added into the solution dropwise and the resulting solution was refluxed at 110 °C for 72 h to crystallize. Thereafter the reaction mixture was cooled to room temperature, and the white crystalline product was isolated with the help of centrifugation. For further purification, the as-synthesized product was re-dispersed at 60 °C in fresh DMF (200 mL) for 2 h and then in MeOH for 2 h. After cooling, the product was washed with fresh MeOH three times and finally dried at 80 °C under vacuum overnight.

## 2. Characterization of catalyst MIL-125.

The crystallinity of the catalyst was investigated by powder X-ray diffraction (PXRD) analysis ( $2\theta = 5\sim 60^\circ$ ) using PANalytical Empyrean instrument with monochromatic  $\text{Cu-K}\alpha$  radiation ( $\lambda = 1.54184 \text{ \AA}$ ) at a scan rate of  $2^\circ/\text{min}$ . The catalyst's morphology was determined with a scanning electron microscope (SEM) from JEOL (JSM-IT300, 0.5–35 kV). Fourier transform infrared spectroscopy (FTIR; Bruker Vertex 80V) was performed to confirm the presence of metal-linker coordination in the MIL-125 structure in the wave range of  $4000\text{--}400 \text{ cm}^{-1}$ . The stability of the catalyst was checked by thermogravimetric analysis (TGA) (Netzsch; STA 449C) at 25 to 800 °C ( $5^\circ/\text{min}$  as the heating rate) under  $\text{N}_2$  flow ( $20 \text{ mL}/\text{min}$ ). The Brunauer-Emmett-Teller (BET) surface area and porosity were measured with the help of Micromeritics ASAP 2020 equipment following  $\text{N}_2$  sorption isotherms, and thereby the sample (MIL-125) was activated at 150 °C for 4 h under vacuum before the measurement. Temperature programmed desorption (TPD) profile of  $\text{NH}_3$  and  $\text{CO}_2$  from the catalyst were determined using a Micromeritics chemisorb 2750 Pulse Chemisorption.

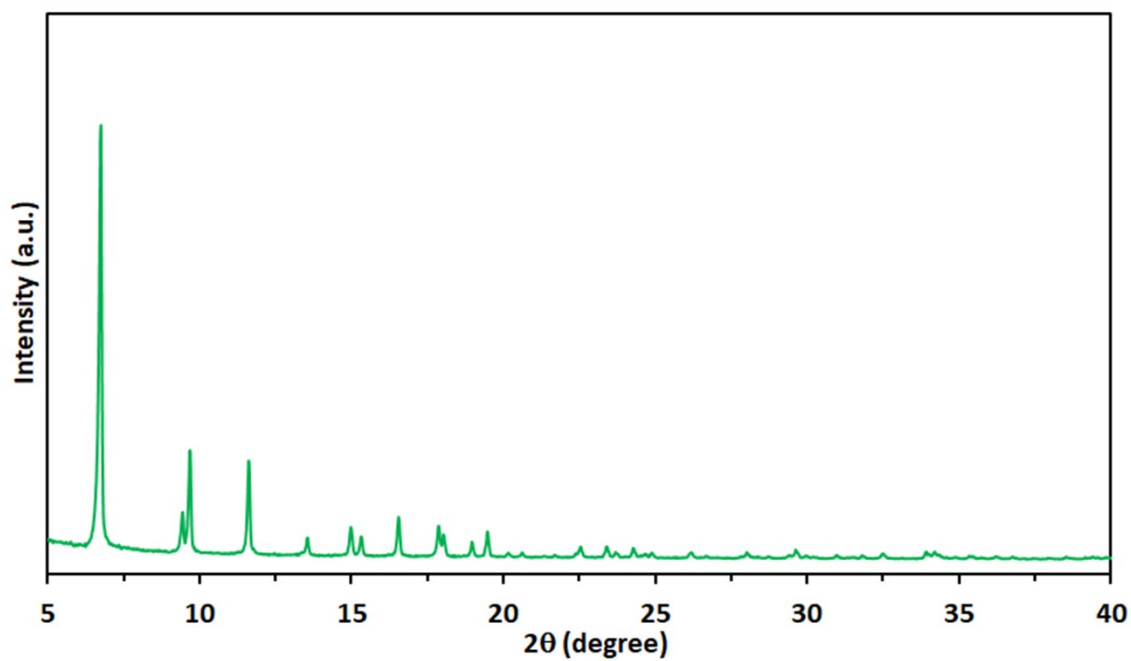

**FIGURE S1** PXRD of MIL-125. All sharp diffraction peaks show the characteristics of MIL-125 and identical to the reported one.<sup>1-2</sup>

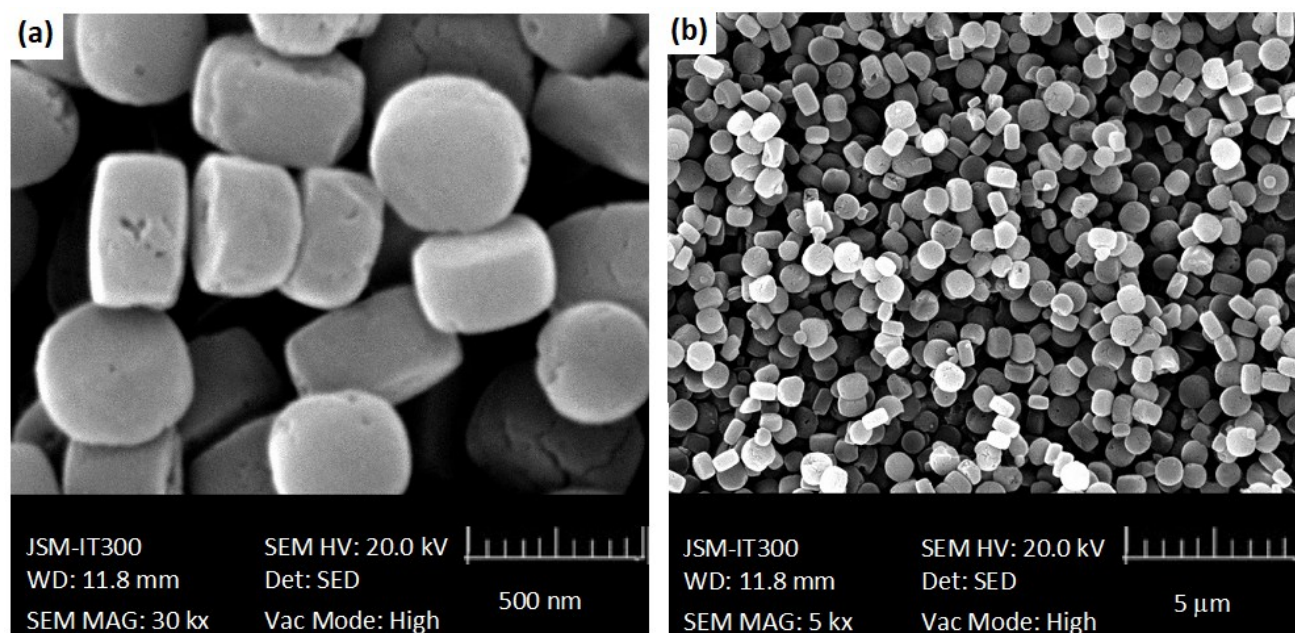

**FIGURE S2** SEM images of MIL-125: (a) 500 nm and (b) 5  $\mu\text{m}$  scale. Disk-like shape of MIL-125 is formed with the average particle size in the range of 0.3-0.5  $\mu\text{m}$ .

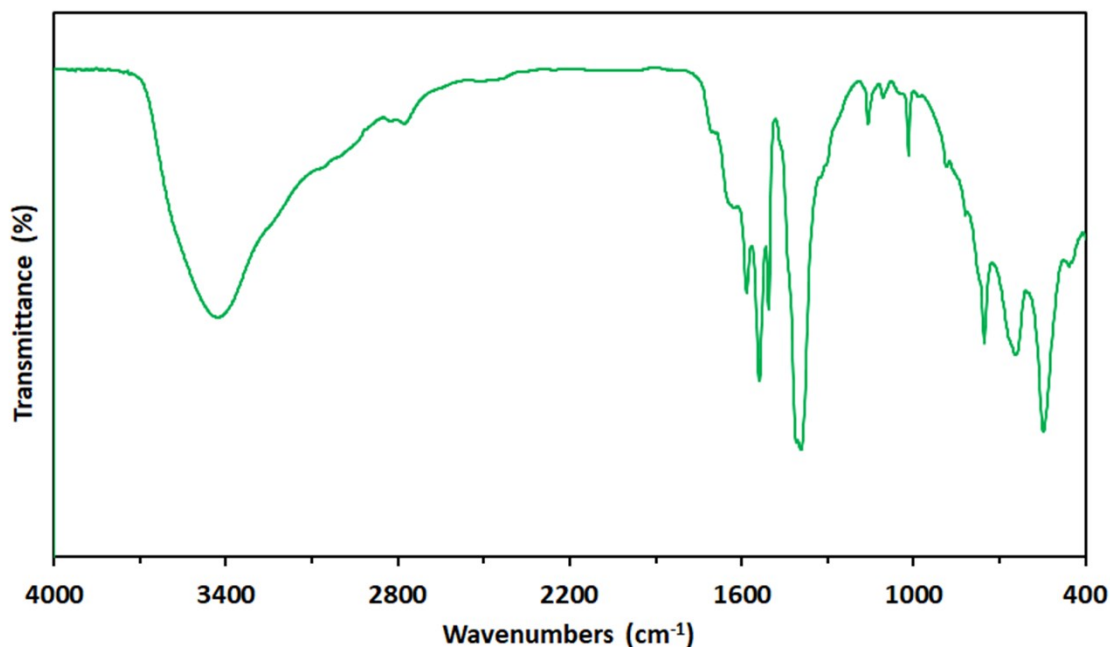

**FIGURE S3** FT-IR spectrum of MIL-125. The characteristics absorption peaks at 800-400 cm<sup>-1</sup> reveal strong indication of O-Ti-O metal-organic nature.<sup>2-3</sup> The absence of absorption peaks at 1710 cm<sup>-1</sup> designates the nonexistence of free H<sub>2</sub>BDC linkers. And other absorption peaks in the FT-IR spectrum confirm the successful formation of MIL-125.<sup>4</sup>

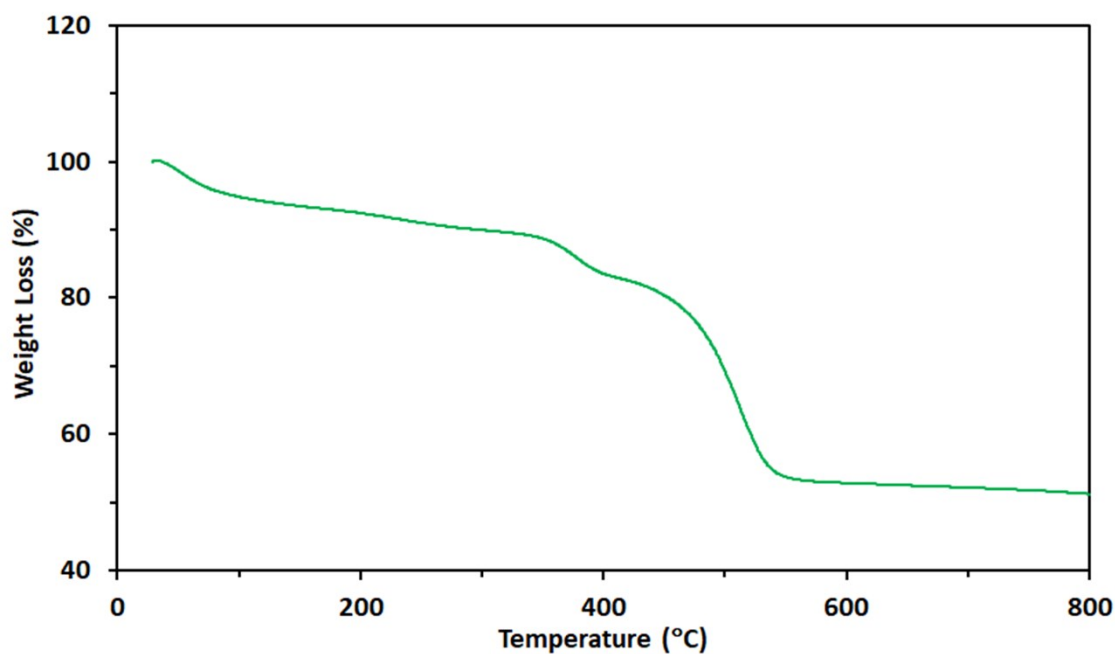

**FIGURE S4** TGA curve of MIL-125 ranging from 30 °C to 800 °C. It shows the first weight loss of MIL-125 around 180 °C, which may be associated with the removal of remaining solvent molecules.

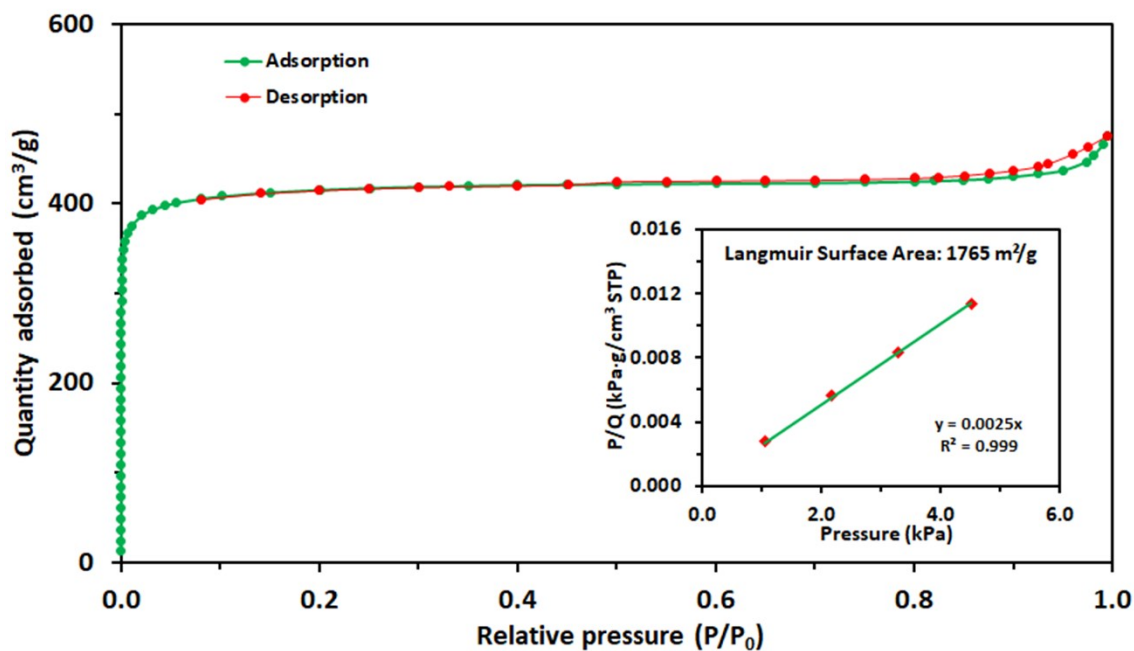

**FIGURE S5** The nitrogen adsorption-desorption isotherms for MIL-125 measured at 77K. The specific surface area estimated by the Brunauer–Emmett–Teller (BET) method and the total pore volume are  $1670 \text{ m}^2 \text{ g}^{-1}$  and  $0.73 \text{ cm}^3 \text{ g}^{-1}$ , respectively, indicating a high surface area of MIL-125.

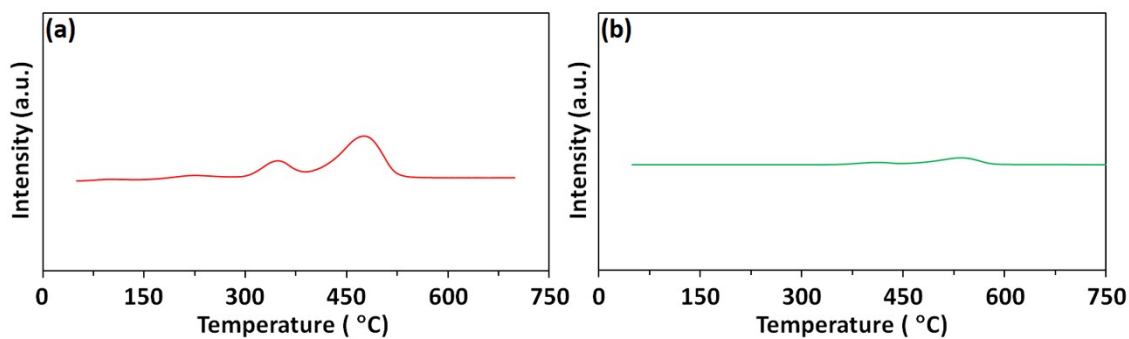

**FIGURE S6** (a)  $\text{NH}_3$ -TPD and (b)  $\text{CO}_2$ -TPD profiles of MIL-125, whereas acid sites are more pronounced than its basic sites.

### 3. Synthesis and characterizations of polymers

**3.1. Synthesis of polymers.** Copolymers, poly(CL-co-VL) were synthesized in bulk by ROP, and all polymerization reactions performed in a standard Schleck flask under an inert atmosphere. Prior to use, the catalyst was activated at 150 °C under vacuum for 12 h. As for the typical polymerization procedure, a predetermined amount of activated MIL-125 (0.025 mmol), CL (1.25 mmol), and VL (1.25 mmol) ([CL]/[VL]/[MIL-125]=50/50/1) were loaded in a standard Schleck flask successively inside the glovebox at room temperature. Then the flask was sealed carefully and placed in a pre-heated oil bath at a constant temperature. After a certain time, the polymerization reactions were terminated by cooling the flask in an ice bath. After cooling and quenching the mixture, the monomer conversion was calculated by <sup>1</sup>H-NMR detection using solvent CDCl<sub>3</sub>. The crude mixture was then dissolved in minimum amount of CHCl<sub>3</sub> and filtered to separate the MIL-125 catalyst and put the filtrate in the open air for evaporation until to dry completely. Later on, the copolymer was precipitated by adding a large excess of cold methanol. After washing with fresh methanol, the polymer product was dried at 50 °C under vacuum for 24 h. Besides, the copolymers with different ratios and low conversion (<10%) were prepared for calculating the reactivity ratio.

**3.2. Characterizations of polymers.** <sup>1</sup>H- and <sup>13</sup>C-NMR spectra of the synthesized polymers were recorded on a Bruker AC-500 NMR spectrometer using CDCl<sub>3</sub> as the solvent and tetramethylsilane (TMS) as an internal standard. FTIR spectroscopy was performed with a Bruker Vertex 80 V FTIR spectrometer. The differential scanning calorimetry (DSC) analysis was conducted using NETZSCH STA 449C instruments. The samples were scanned from RT to 100 °C at a heating rate of 10 °C/min to remove the moisture and then cooled to -70 °C at 5 °C/min (cooling scan rate). And finally, it was scanned again from -70 °C to 120 °C at a heating rate of 5 °C/min (heating scan). The glass transition temperature ( $T_g$ ) and melting temperature ( $T_m$ ) were measured from cooling and heating scan graphs, respectively. Molecular weight ( $M_n$ ) and the dispersity ( $\mathcal{D}$ ) of the polymers were determined by PL-GPC 50 with PLgel 5 $\mu$ m MIXED-C column (300mm $\times$ 7.5mm), Agilent Technology in THF (Fisher, HPLC grade, stabilized with BHT, 2.5ppm) using polystyrene (PS) as a standard. Before determining molecular weights, samples were dissolved in THF (Fisher, HPLC grade, stabilized with BHT, 2.5 ppm) for 24 h and then filtered where the concentration was maintained around 2.5 mg mL<sup>-1</sup>. Matrix-assisted laser desorption ionization-time of flight mass spectroscopy (MALDI-TOF MS) of low molecular weight polymeric sample was performed using Bruker ultrafleXtreme<sup>TM</sup> spectrometer. Here,  $\alpha$ -cyano- 4-hydroxycinnamic acid was used as a matrix. Moreover, induced coupled plasma (ICP) was performed for both solution mixture and resultant copolymers under Ar gas flow (0.3MPa).

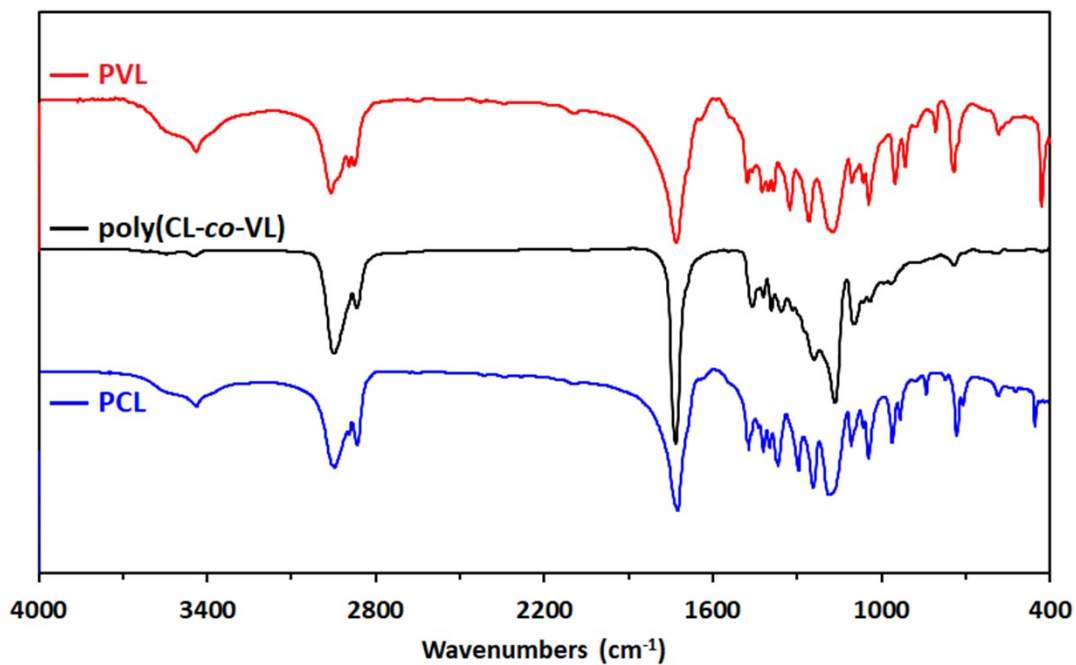

FIGURE S7 Comparison of FT-IR spectra of PCL, PVL and poly(CL-co-VL).

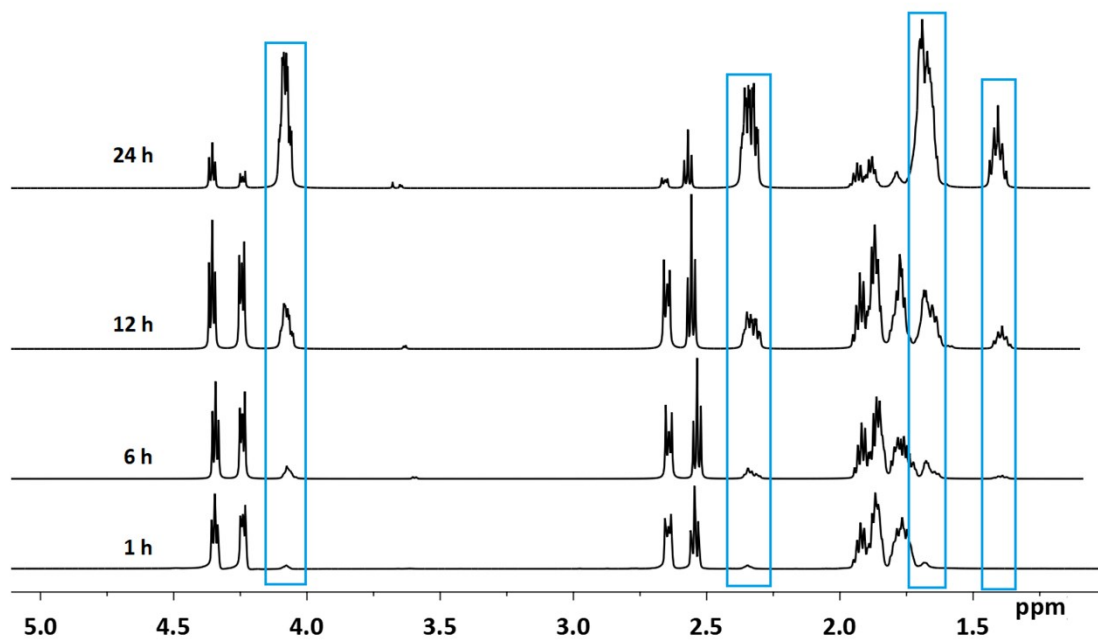

FIGURE S8  $^1\text{H}$  NMR spectra of copolymers obtained at different time.



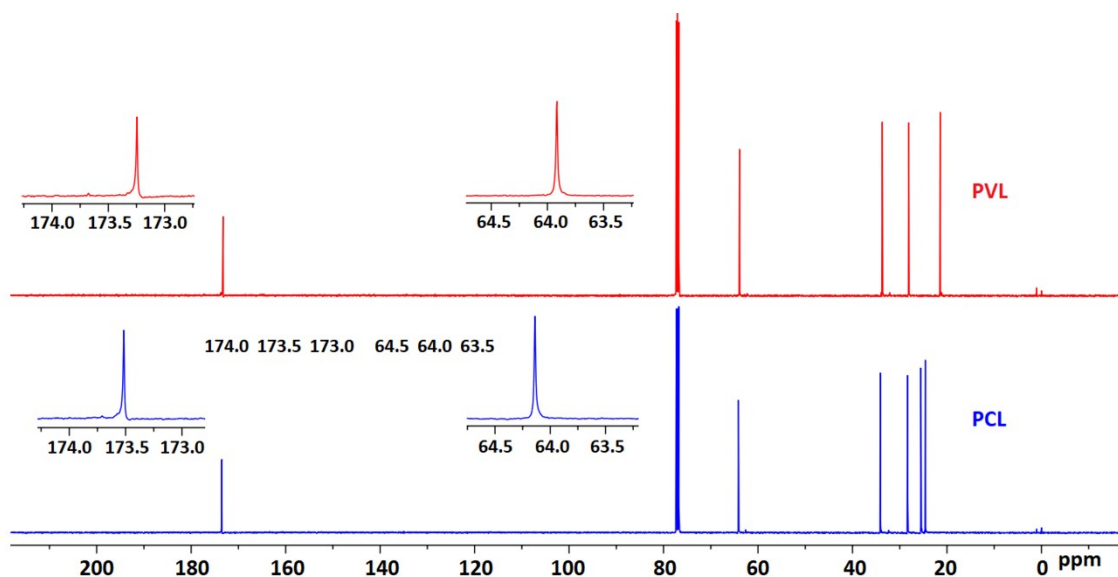

**FIGURE S9**  $^{13}\text{C}$  NMR of PCL (Table 1, entry 1) and PVL (Table 1, entry 7).

### Randomness Calculation

By following given equations, the average sequence length (L) and degree of randomness (R) were calculated which are related to the peak area in  $^{13}\text{C}$  NMR.<sup>5</sup>

$$\begin{aligned}
 &\text{Sequence length of CL unit in copolymer, } L_c = \frac{l_{cc}}{l_{vc}} + 1 & R = \frac{1}{L_c} + \frac{1}{L_v} \\
 &\text{Sequence length of VL unit in copolymer, } L_v = \frac{l_{vv}}{l_{cv}} + 1 & R=0; \text{ block copolymer} \\
 & & R=1; \text{ random copolymer} \\
 & & R=2; \text{ alternating copolymer}
 \end{aligned}$$

Where,  $l_{cc}$ ,  $l_{vc}$ ,  $l_{vv}$  and  $l_{cv}$  represents the integral area of peaks at 64.14, 63.83, 63.91 and 64.21 ppm region in  $^{13}\text{C}$  NMR of poly(CL-co-VL) (Fig. 3). Here, R values are found equal to 1 in the whole range of composition which confirm the formation of random copolymer.

### Reactivity ratio

Using the method of Fineman-Ross, the reactivity ratio of CL and VL was calculated.<sup>6</sup> At low monomer conversion various copolymers were prepared and their compositions were calculated by  $^1\text{H}$  NMR.

$$\frac{F(f-1)}{f} = r_1 \frac{F^2}{f} - r_2$$

Thus, a plot of  $\frac{F(f-1)}{f}$  vs.  $\frac{F^2}{f}$  yields a straight line with slope equal to  $r_1$  and intercept to  $r_2$ .

**TABLE S1** Molar feed ratio of the monomer CL and VL, and copolymer composition of Poly(CL-co-VL).

| CL:VL | F <sup>a</sup> | f <sup>b</sup> | F <sup>2</sup> /f | F(f-1)/f | r <sub>1</sub> | r <sub>2</sub> | r <sub>1</sub> r <sub>2</sub> |
|-------|----------------|----------------|-------------------|----------|----------------|----------------|-------------------------------|
| 85:15 | 5.67           | 6.14           | 5.23              | 4.74     |                |                |                               |
| 65:35 | 1.86           | 1.56           | 2.21              | 0.67     |                |                |                               |
| 50:50 | 1.00           | 1.04           | 0.96              | 0.04     | 1.0488         | 0.9921         | 1.0405                        |
| 35:65 | 0.54           | 0.59           | 0.49              | -0.38    |                |                |                               |
| 15:85 | 0.18           | 0.23           | 0.13              | -0.58    |                |                |                               |

<sup>a</sup> molar ratio of CL to VL in reaction mixture; <sup>b</sup> molar ratio of CL to VL in copolymer determined by <sup>1</sup>H NMR spectroscopy; r<sub>1</sub> and r<sub>2</sub>, the reactivity ratio of CL and VL, respectively.

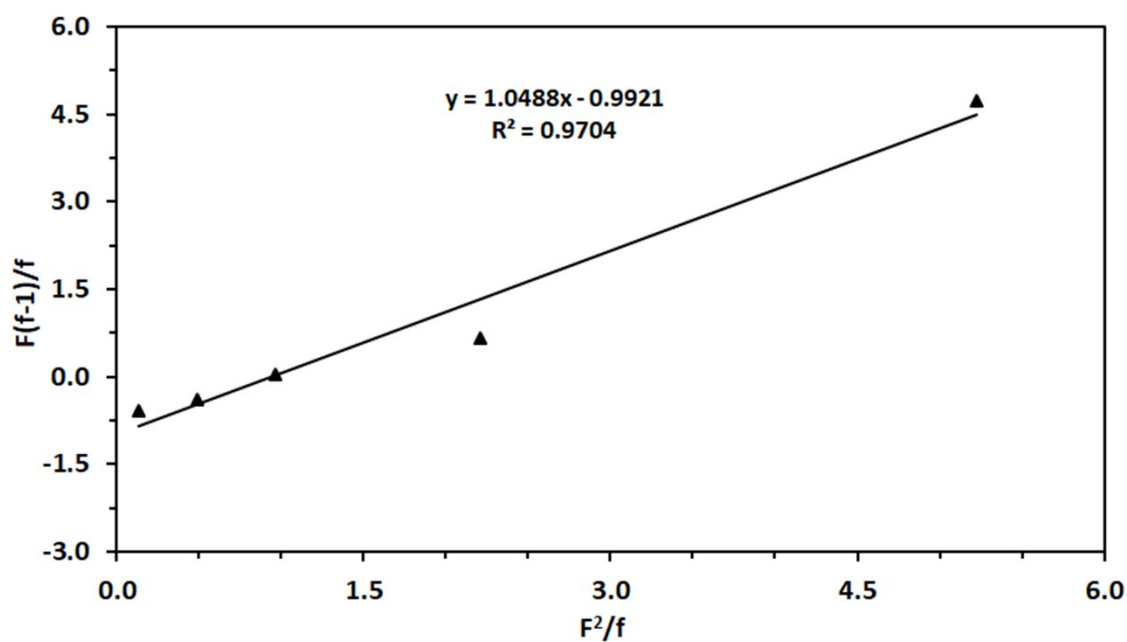

**FIGURE S10** Reactivity ratio analysis of CL and VL.

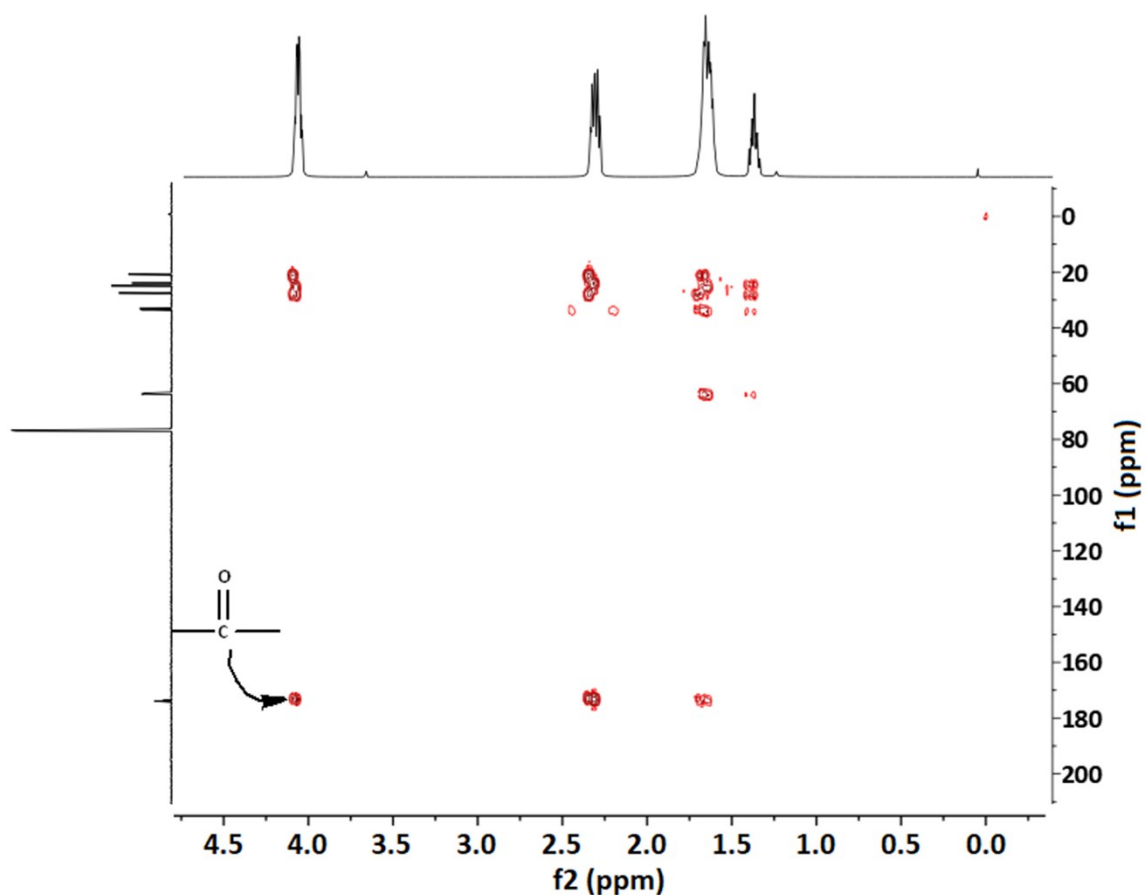

**FIGURE S11**  $^1\text{H}$ - $^{13}\text{C}$  HMBC NMR spectrum of Poly(CL-co-VL) initiated by MIL-125 (Table 1, entry 4).

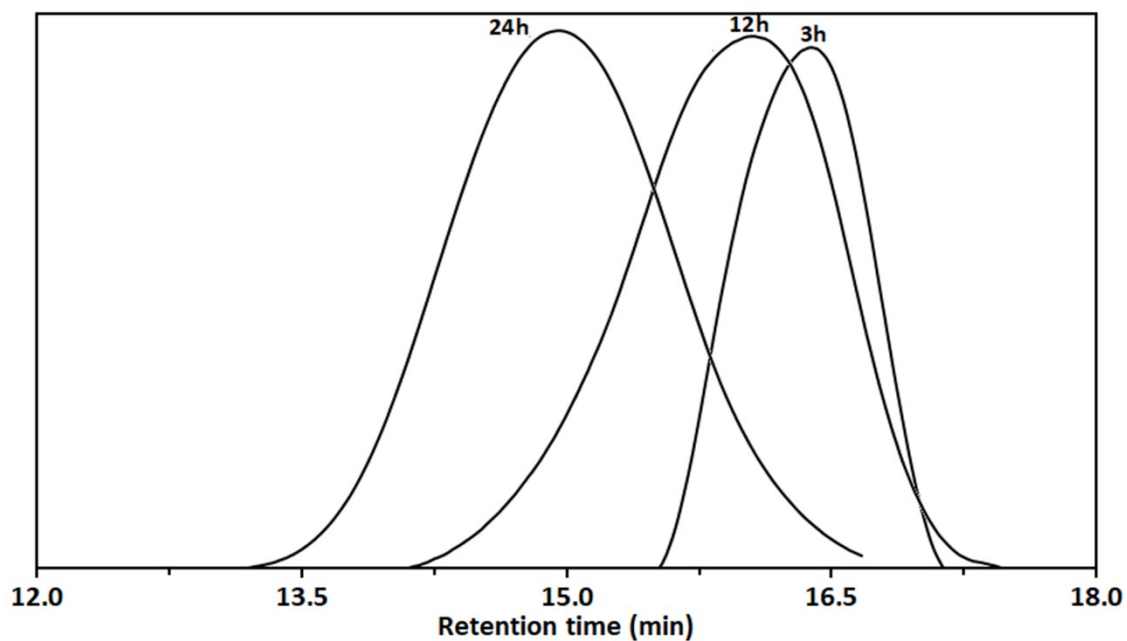

**FIGURE S12** GPC traces of obtained Poly(CL-co-VL) at different time with 50/50 molar feed ratio of CL/VL (eluent THF, flow rate 1.0 mL/min, PS standard).

**TABLE S2** Kinetics study of the copolymerization of CL with VL using MIL-125 in bulk at 140 °C<sup>a</sup>.

| entry | time (h) | conv. <sup>b</sup> (%) |    | $M_n$ <sup>c</sup> (kg/mol) | $\bar{D}$ <sup>c</sup> |
|-------|----------|------------------------|----|-----------------------------|------------------------|
|       |          | CL                     | VL |                             |                        |
| 1     | 0        | 0                      | 0  | -                           | -                      |
| 2     | 1        | 7                      | 7  | 2.0                         | 1.11                   |
| 3     | 3        | 10                     | 10 | 4.9                         | 1.15                   |
| 4     | 6        | 29                     | 27 | 5.2                         | 1.16                   |
| 5     | 9        | 46                     | 45 | 9.1                         | 1.34                   |
| 6     | 12       | 72                     | 70 | 12.2                        | 1.54                   |
| 7     | 24       | 95                     | 89 | 20.2                        | 1.64                   |

<sup>a</sup> molar feed ratio of CL and VL=50; <sup>b</sup> conversion determined by <sup>1</sup>H NMR spectroscopy in CDCl<sub>3</sub>; <sup>c</sup> number average molecular weight and dispersity measured by GPC with polystyrene calibration.

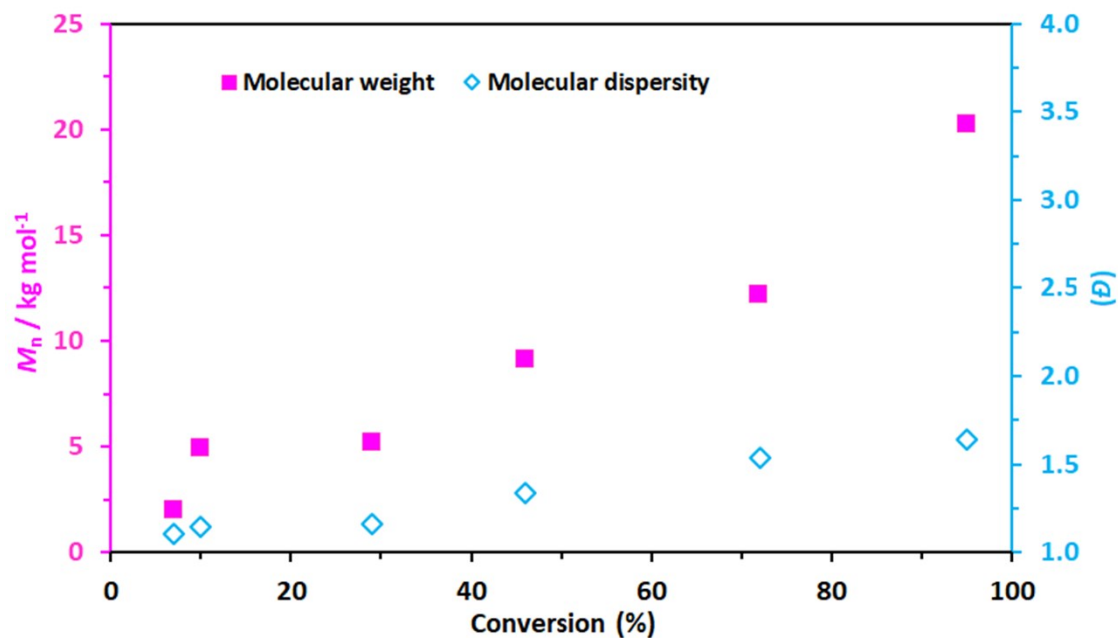

**FIGURE S13** Dependence of molecular weight ( $M_n$ ) and dispersity ( $\bar{D}$ ) on monomer conversion for poly(CL-co-VL) synthesis using MIL-125.

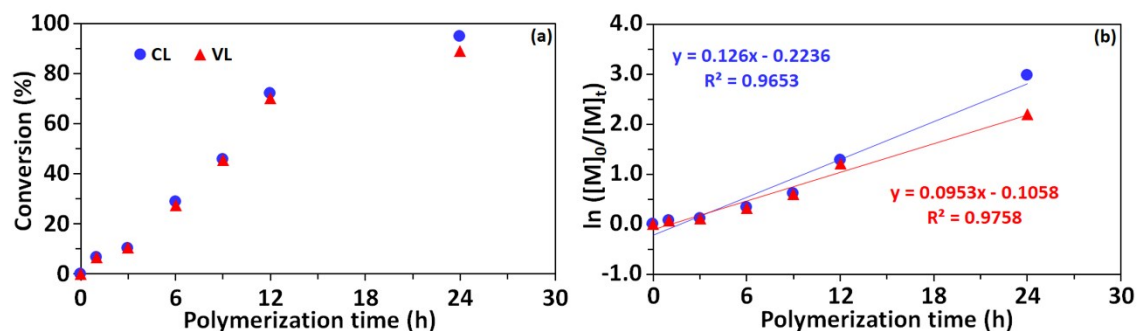

**FIGURE S14** Kinetics study for Poly(CL-co-VL) synthesis: (a) conversion of monomer CL and VL with polymerization time (b)  $\ln([M]_0/[M]_t)$  vs. polymerization time of each monomer at molar feed ratio of CL and VL = 50:50 and 140 °C.

**Table S3** Thermal behaviour of synthesized copolymers

| entry | (CL:VL) <sup>a</sup> | $T_m$ (°C) | $T_g$ (°C) | $\Delta H_m$ (Jg <sup>-1</sup> ) | $R^b$ |
|-------|----------------------|------------|------------|----------------------------------|-------|
| 1     | 100:0                | 59.4       | -56.2      | 77.21                            | -     |
| 2     | 85:15                | 23.8       | -66.5      | 72.53                            | 1.00  |
| 3     | 65:35                | 22.4       | -61.7      | 67.95                            | 1.00  |
| 4     | 50:50                | 21.2       | -66.7      | 66.50                            | 1.00  |
| 5     | 35:65                | 22.0       | -61.5      | 64.26                            | 1.00  |
| 6     | 15:85                | 25.1       | -66.4      | 56.54                            | 1.00  |
| 7     | 0:100                | 62.1       | -55.7      | 87.85                            | -     |

<sup>a</sup> molar feed ratio of CL and VL; <sup>b</sup> degree of randomness, calculated from <sup>13</sup>C NMR spectroscopy.

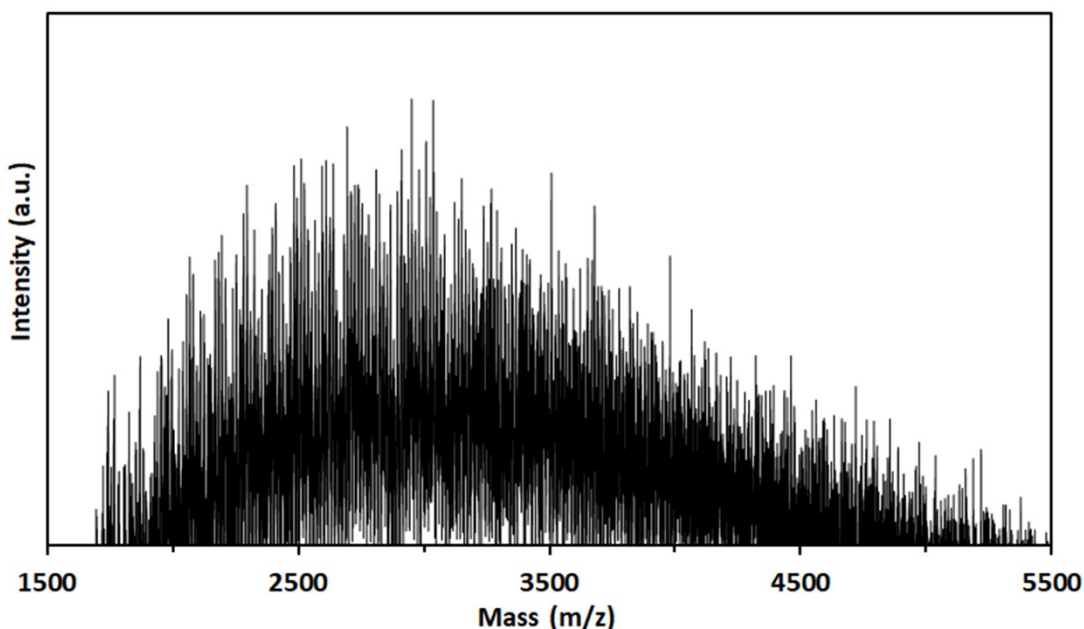

**FIGURE S15** MALDI-TOF MS spectra of low molecular weight poly(CL-co-VL) copolymer.

**TABLE S4** Assignment of calculated and experimental MALDI-TOF MS signals.

| <b>N<sup>a</sup></b> | <b>m<sup>b</sup></b> | <b>n<sup>b</sup></b> | <b>m/z (cal.)</b> | <b>m/z (exp.)</b> | <b>Structure <sup>c</sup></b> |
|----------------------|----------------------|----------------------|-------------------|-------------------|-------------------------------|
| 24                   | 11                   | 13                   | 2580.10           | 2580.73           | Cyclic                        |
|                      | 12                   | 12                   | 2594.12           | 2594.67           | Cyclic                        |
| 25                   | 11                   | 14                   | 2680.22           | 2680.85           | Cyclic                        |
|                      | 13                   | 12                   | 2708.26           | 2708.50           | Cyclic                        |
| 26                   | 11                   | 15                   | 2780.34           | 2779.78           | Cyclic                        |
|                      | 14                   | 12                   | 2822.40           | 2822.64           | Cyclic                        |
| 27                   | 11                   | 16                   | 2880.46           | 2879.85           | Cyclic                        |
|                      | 15                   | 12                   | 2936.54           | 2937.13           | Cyclic                        |
| 28                   | 11                   | 17                   | 2980.58           | 2980.33           | Cyclic                        |
| 24                   | 11                   | 13                   | 2598.12           | 2598.12           | Linear                        |
|                      | 12                   | 12                   | 2612.14           | 2610.54           | Linear                        |
| 25                   | 11                   | 14                   | 2698.24           | 2697.62           | Linear                        |
|                      | 13                   | 12                   | 2726.28           | 2727.60           | Linear                        |
| 26                   | 11                   | 15                   | 2798.36           | 2798.49           | Linear                        |
|                      | 14                   | 12                   | 2840.42           | 2840.99           | Linear                        |
| 27                   | 11                   | 16                   | 2898.48           | 2898.55           | Linear                        |
|                      | 15                   | 12                   | 2954.56           | 2953.17           | Linear                        |
| 28                   | 11                   | 17                   | 2998.60           | 2998.01           | Linear                        |

<sup>a</sup>total number of repeating units in copolymer; <sup>b</sup> number of CL or VL repeating units; <sup>c</sup> for cyclic follows  $114.12m + 100.12n + 23$  and for linear follows  $114.14m + 100.12n + 18.015 + 23$  formula.

**TABLE S5** Copolymerization of CL with VL initiated with the components of MIL-125<sup>a</sup>

| <b>entry</b> | <b>catalyst</b>                                         | <b>conv.<sup>b</sup> (%)</b> |           | <b>M<sub>n</sub><sup>c</sup> (kg/mol)</b> | <b>Đ<sup>c</sup></b> |
|--------------|---------------------------------------------------------|------------------------------|-----------|-------------------------------------------|----------------------|
|              |                                                         | <b>CL</b>                    | <b>VL</b> |                                           |                      |
| 1            | benzene-1,4-dicarboxylic acid [BDC]                     | 29                           | 40        | 30.5                                      | 1.50                 |
| 2            | titanium isopropoxide [Ti( <i>i</i> PrO) <sub>4</sub> ] | 99                           | 96        | 50.1                                      | 1.21                 |

<sup>a</sup> molar feed ratio of CL and VL = 50:50, temperature = 140 °C and time = 24 h; <sup>b</sup> conversion determined by <sup>1</sup>H NMR spectroscopy in CDCl<sub>3</sub>; <sup>c</sup> number average molecular weight and dispersity measured by GPC with polystyrene calibration.

#### 4. Comparison between before and after polymerization

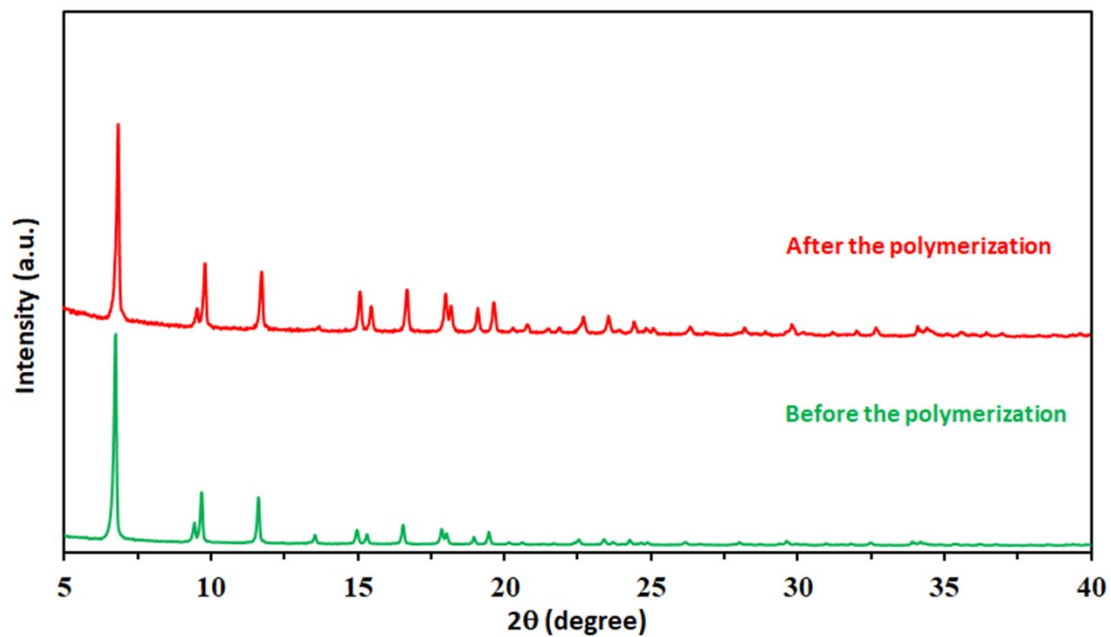

**FIGURE S16** PXRD patterns of MIL-125: before (bottom) and after (top) the polymerization reaction.

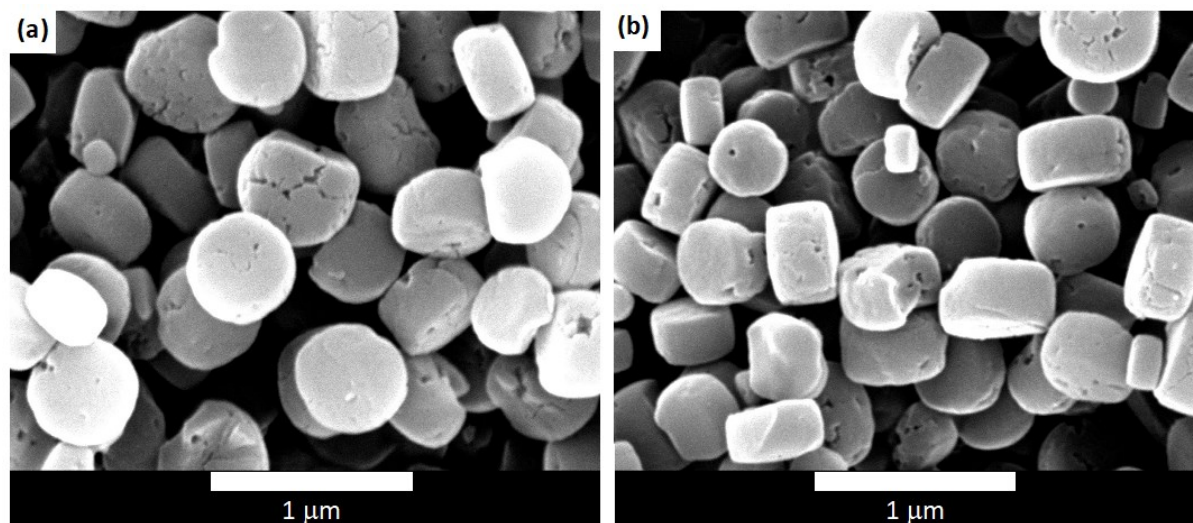

**FIGURE S17** SEM images of MIL-125: before (a) and after (b) the polymerization reaction.

**TABLE S6** Metal content in MIL-125 before and after polymerization reaction along with poly(CL-co-VL) by ICP analysis.

| entry | sample                                    | Ti (wt.%) |
|-------|-------------------------------------------|-----------|
| 1     | Pristine MIL-125                          | 25.09     |
| 2     | Recovered MIL-125 (3 <sup>rd</sup> cycle) | 24.48     |
| 3     | Poly(CL-co-VL) <sup>a</sup>               | No        |

<sup>a</sup> molar feed ratio of CL and VL = 50:50; temperature = 140 °C; time = 24 h.

**TABLE S7** Catalyst (MIL-125) recycling studies.

| run <sup>a</sup> | conv. <sup>b</sup> (%) |    | $M_n$ <sup>c</sup> (kg/mol) | $\bar{D}$ <sup>c</sup> |
|------------------|------------------------|----|-----------------------------|------------------------|
|                  | CL                     | VL |                             |                        |
| 1                | 95                     | 89 | 20.2                        | 1.64                   |
| 2                | 94                     | 89 | 19.9                        | 1.61                   |
| 3                | 93                     | 88 | 18.4                        | 1.56                   |

<sup>a</sup> molar feed ratio of CL and VL = 50:50, temperature = 140 °C and time = 24 h; <sup>b</sup> Calculated by <sup>1</sup>H-NMR using CDCl<sub>3</sub>; <sup>c</sup>Determined by GPC analysis in THF at room temperature referenced to polystyrene standards.

## References

- 1 I. D. Ivanchikova, J. S. Lee, N. V. Maksimchuk, A. N. Shmakov, Y. A. Chesalov, A. B. Ayupov, Y. K. Hwang, C. H. Jun, J. S. Chang and O. A. Kholdeeva, *Eur. J. Inorg. Chem.*, 2014, **2014**, 132.
- 2 W. P. Mounfield, C. Han, S. H. Pang, U. Tumuluri, Y. Jiao, S. Bhattacharyya, M. R. Dutzer, S. Nair, Z. Wu, R. P. Lively, D. S. Sholl and K. S. Walton, *J. Phys. Chem. C*, 2016, **120**, 27230.
- 3 J. G. Santaclara, M. A. Nasalevich, S. Castellanos, W. H. Evers, F. C. M. Spoor, K. Rock, L. D. A. Siebbeles, F. Kapteijn, F. Grozema, A. Houtepen, J. Gascon, J. Hunger and M. A. van der Veen, *ChemSusChem*, 2016, **9**, 388.
- 4 M. Dan-Hardi, C. Serre, T. Frot, L. Rozes, G. Maurin, C. Sanchez and G. Férey, *J. Am. Chem. Soc.*, 2009, **131**, 10857.
- 5(a) T. Wu, Z. Wei, Y. Ren, Y. Yu, X. Leng and Y. Li, *Polym. Degrad. Stabil.*, 2018, **155**, 173; (b) M. T. Hunley, N. Sari and K. L. Beers, *ACS Macro Letters*, 2013, **2**, 375; (c) N. Nomura, A. Akita, R. Ishii and M. Mizuno, *J. Am. Chem. Soc.*, 2010, **132**, 1750.
- 6(a) M. Fineman and S. D. Ross, *J. Polym. Sci.*, 1950, **5**, 259; (b) W. Ritchey and L. Ball, *J. Polym. Sci. Pol. Lett.*, 1966, **4**, 557; (c) B. S. Beckingham, G. E. Sanoja and N. A. Lynd, *Macromolecules*, 2015, **48**, 6922.
